# Supplementary material for: Hydrodeoxygenation of Lignin-Based Compounds over Ruthenium Catalysts Based on Sulfonated Porous Aromatic Frameworks
Source: MDPI journal article supplement (doi:10.3390/polym15234618), 2023-12-04
Supplement: s1 [file s1]

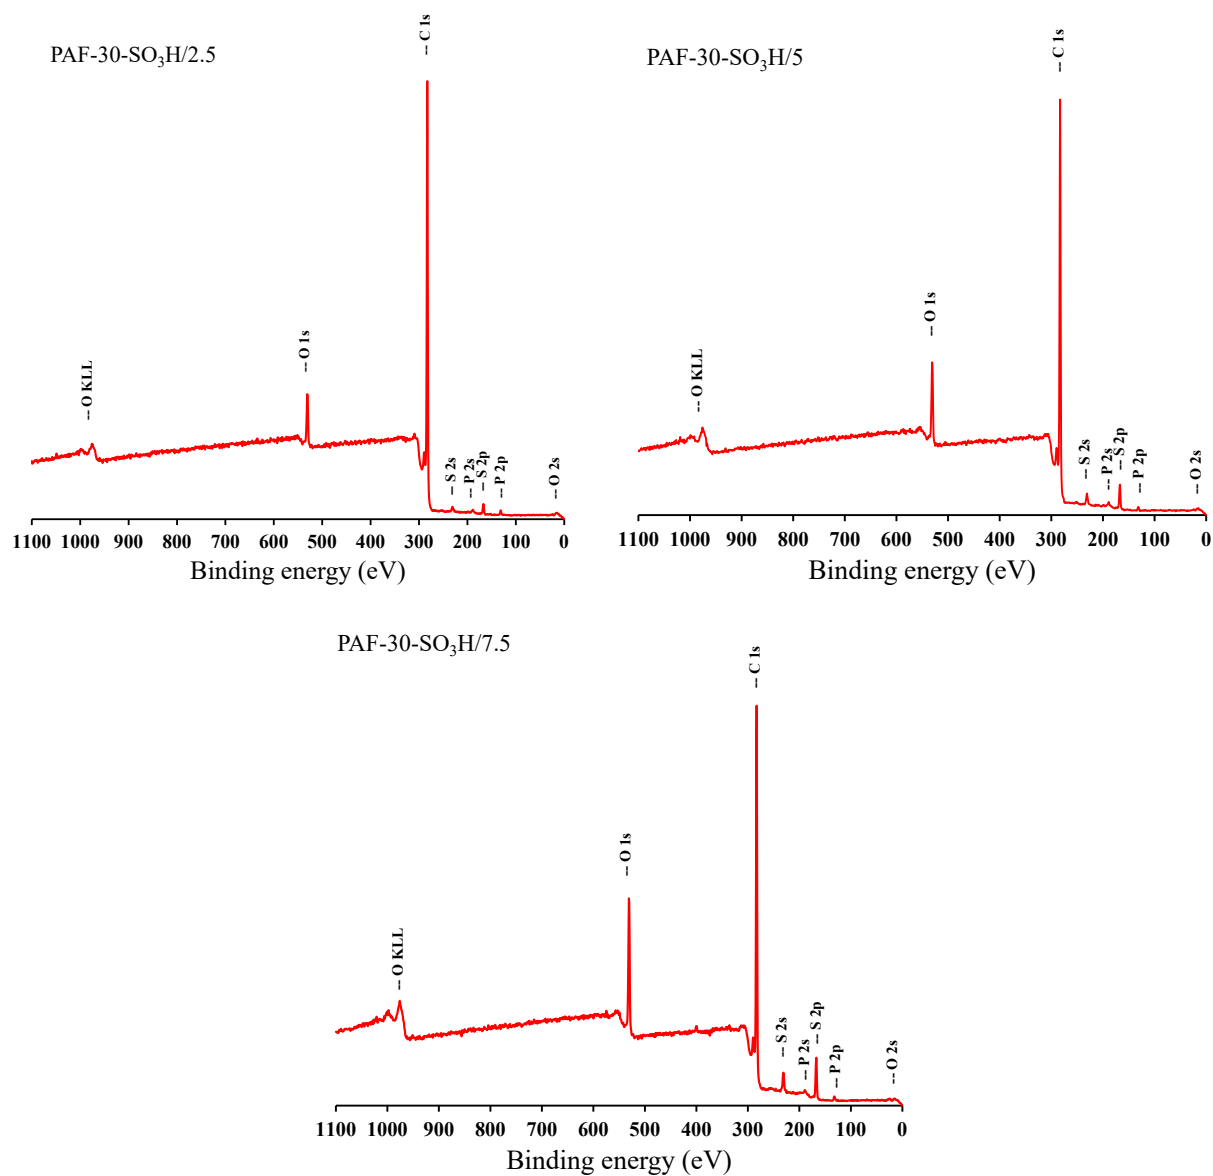

**Figure S1.** The XPS survey spectra for PAF-30-SO<sub>3</sub>H/X (X = 2.5, 5, 7.5).

**Table S1.** Components of the XPS spectra.

| Materials                           | Element content, at. % |          |          |          |           |
|-------------------------------------|------------------------|----------|----------|----------|-----------|
|                                     | <i>C</i>               | <i>O</i> | <i>P</i> | <i>S</i> | <i>Ru</i> |
| PAF-30-SO <sub>3</sub> H/2.5        | 92.0                   | 6.4      | 0.6      | 1.0      | -         |
| PAF-30-SO <sub>3</sub> H/5          | 87.1                   | 10.1     | 0.5      | 2.3      | -         |
| PAF-30-SO <sub>3</sub> H/7.5        | 80.9                   | 14.6     | 0.6      | 3.9      | -         |
| Ru-PAF-30-SO <sub>3</sub> H/2.5-COD | 79.8                   | 15.3     | 0.2      | 0.6      | 4.1       |
| Ru-PAF-30-SO <sub>3</sub> H/5-COD   | 76.2                   | 17.2     | 0.3      | 3.3      | 3.0       |
| Ru-PAF-30-SO <sub>3</sub> H/7.5-COD | 77.0                   | 17.1     | 0.2      | 3.4      | 2.3       |
| Ru-PAF-30-SO <sub>3</sub> H/2.5     | 79.7                   | 15.1     | 0.3      | 0.5      | 4.4       |
| Ru-PAF-30-SO <sub>3</sub> H/5       | 71.5                   | 19.2     | 0.3      | 2.7      | 6.3       |
| Ru-PAF-30-SO <sub>3</sub> H/7.5     | 76.5                   | 16.9     | 0.1      | 3.5      | 3.0       |

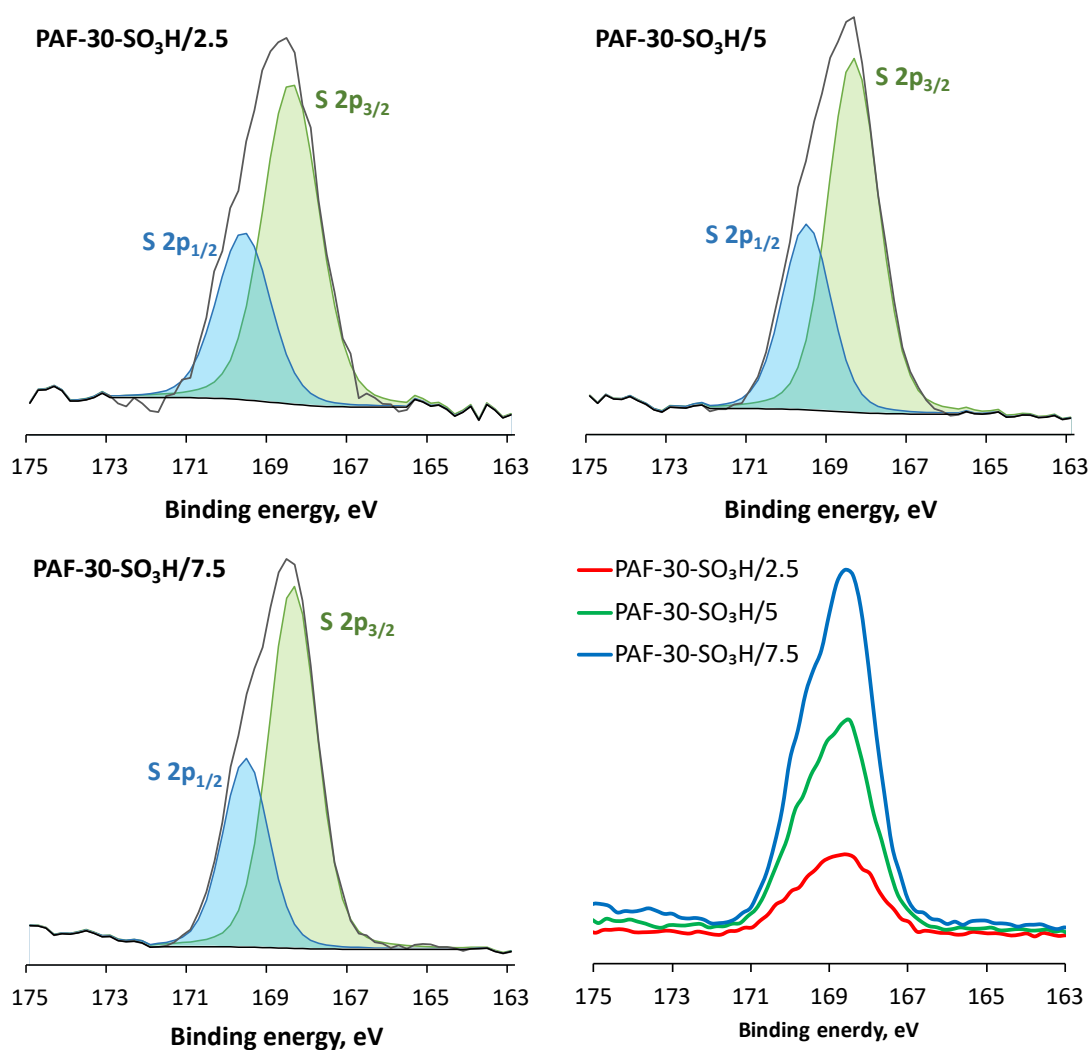

Figure S2. High-resolution XPS spectra of S2p region for PAF-30-SO<sub>3</sub>H/X (X = 2.5, 5, 7.5).

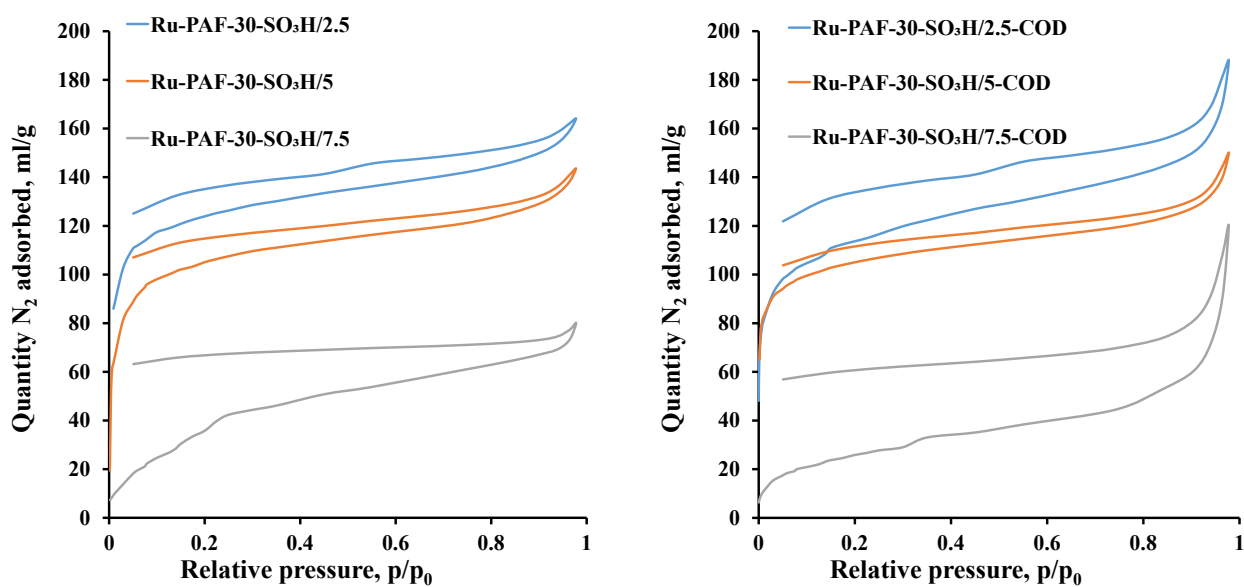

Figure S3. N<sub>2</sub> adsorption isotherms for synthesized catalysts.

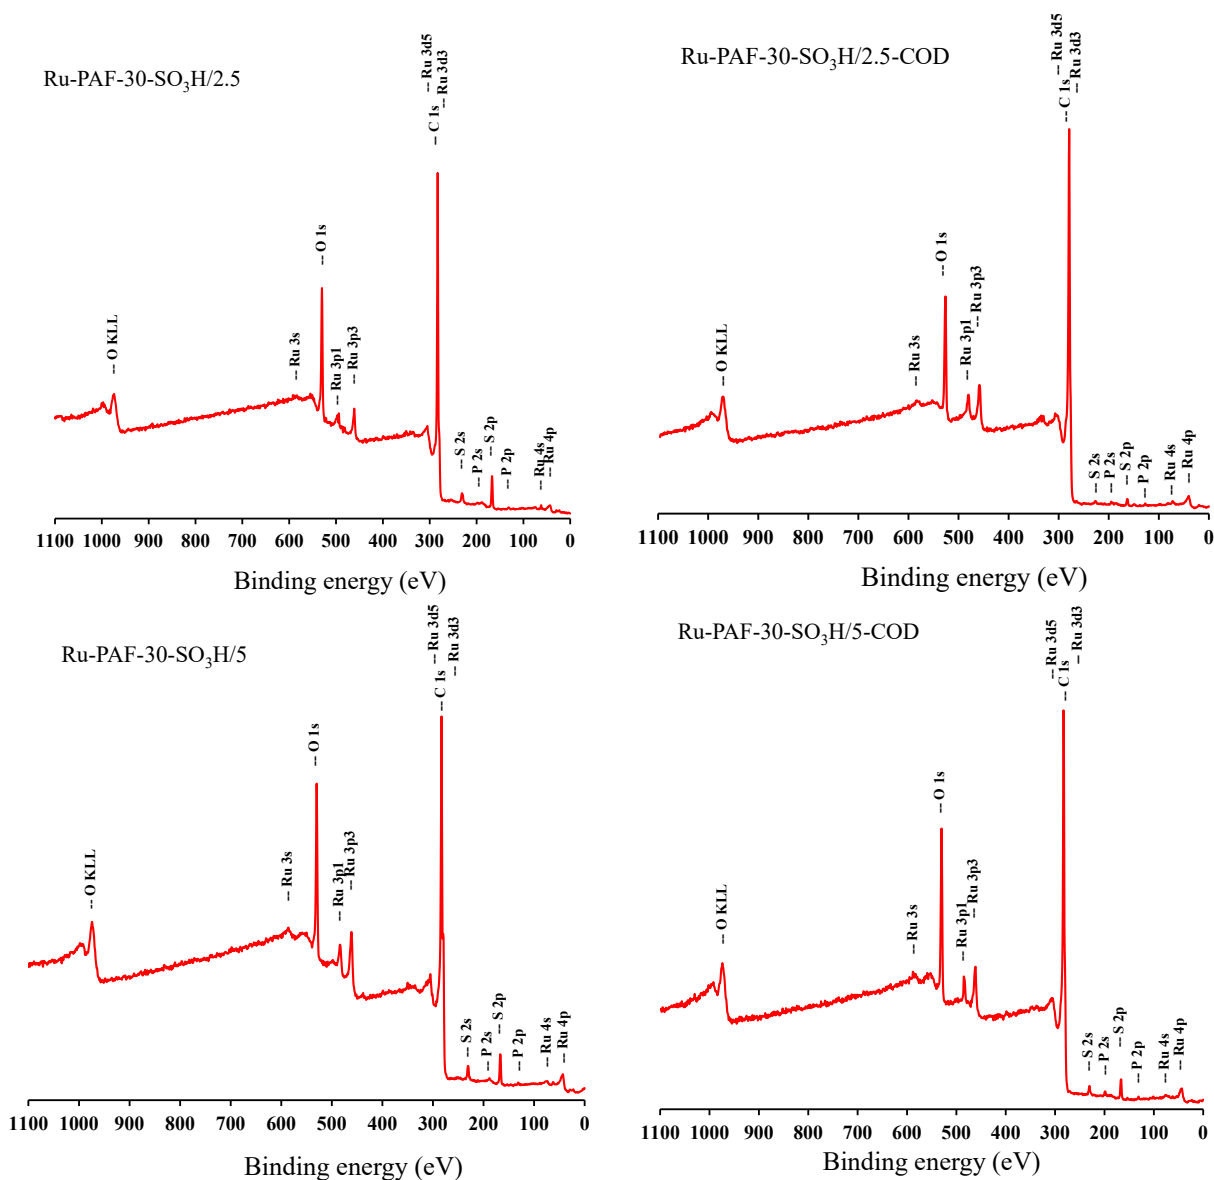

**Figure S4.** The XPS survey spectra for ruthenium catalysts.

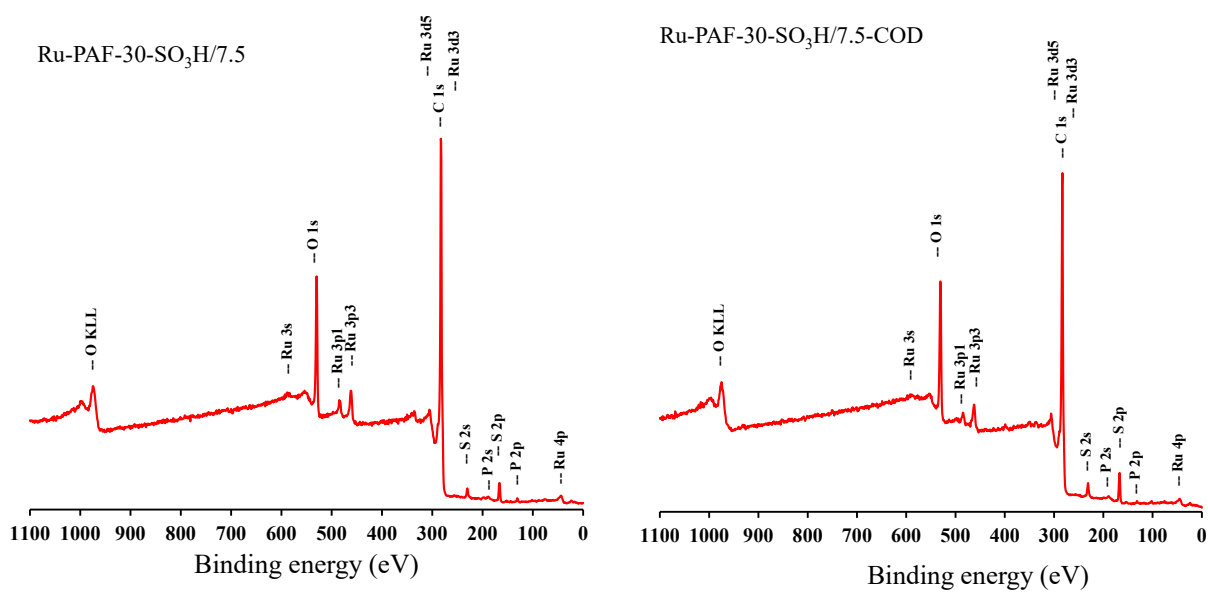

**Figure S4. (end)** The XPS survey spectra for ruthenium catalysts

**Table S2.** Peak parameters for XPS spectra of obtained ruthenium catalysts.

| Catalyst                                      | Ru <sup>0</sup>   |                   | RuO <sub>2</sub>  |                   | RuO <sub>2</sub> × xH <sub>2</sub> O |                   | C<br>1s | π-π<br>1s |
|-----------------------------------------------|-------------------|-------------------|-------------------|-------------------|--------------------------------------|-------------------|---------|-----------|
|                                               | 3d <sub>5/2</sub> | 3d <sub>3/2</sub> | 3d <sub>5/2</sub> | 3d <sub>3/2</sub> | 3d <sub>5/2</sub>                    | 3d <sub>3/2</sub> |         |           |
| <i>Ru</i> -PAF-30-SO <sub>3</sub> H / 2.5     | 16.3%             |                   | 62.0%             |                   | 21.7%                                |                   | 284.58  | 290.86    |
|                                               | 280.19            | 284.36            | 281.10            | 285.27            | 282.30                               | 286.47            |         |           |
| <i>Ru</i> -PAF-30-SO <sub>3</sub> H / 5       | 27.3%             |                   | 59.3%             |                   | 13.4%                                |                   | 284.60  | 290.80    |
|                                               | 280.10            | 284.27            | 281.17            | 285.34            | 282.46                               | 286.63            |         |           |
| <i>Ru</i> -PAF-30-SO <sub>3</sub> H / 7.5     | —                 |                   | 87.0%             |                   | 13.0%                                |                   | 284.54  | 290.98    |
|                                               |                   |                   | 281.36            | 285.53            | 282.40                               | 286.57            |         |           |
| <i>Ru</i> -PAF-30-SO <sub>3</sub> H / 2.5-COD | —                 |                   | 66.1%             |                   | 43.9%                                |                   | 284.52  | 290.95    |
|                                               |                   |                   | 281.37            | 285.54            | 282.31                               | 286.48            |         |           |
| <i>Ru</i> -PAF-30-SO <sub>3</sub> H / 5-COD   | —                 |                   | 45.6%             |                   | 54.4%                                |                   | 284.50  | 290.80    |
|                                               |                   |                   | 281.40            | 285.57            | 282.36                               | 286.53            |         |           |
| <i>Ru</i> -PAF-30-SO <sub>3</sub> H / 7.5-COD | —                 |                   | 67.6%             |                   | 32.4%                                |                   | 284.54  | 291.00    |
|                                               |                   |                   | 281.39            | 285.56            | 282.34                               | 286.51            |         |           |

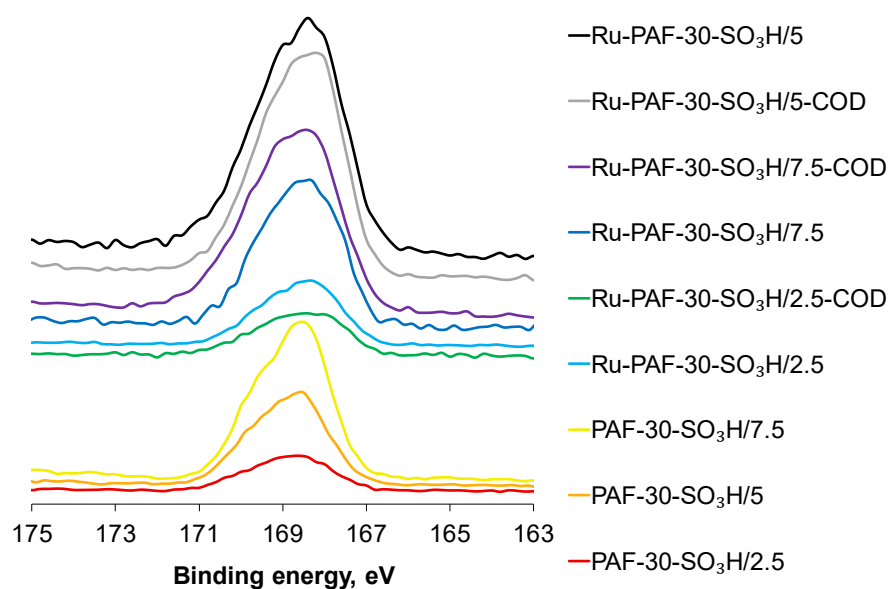

**Figure S5.** High-resolution XPS spectra of S2p region.

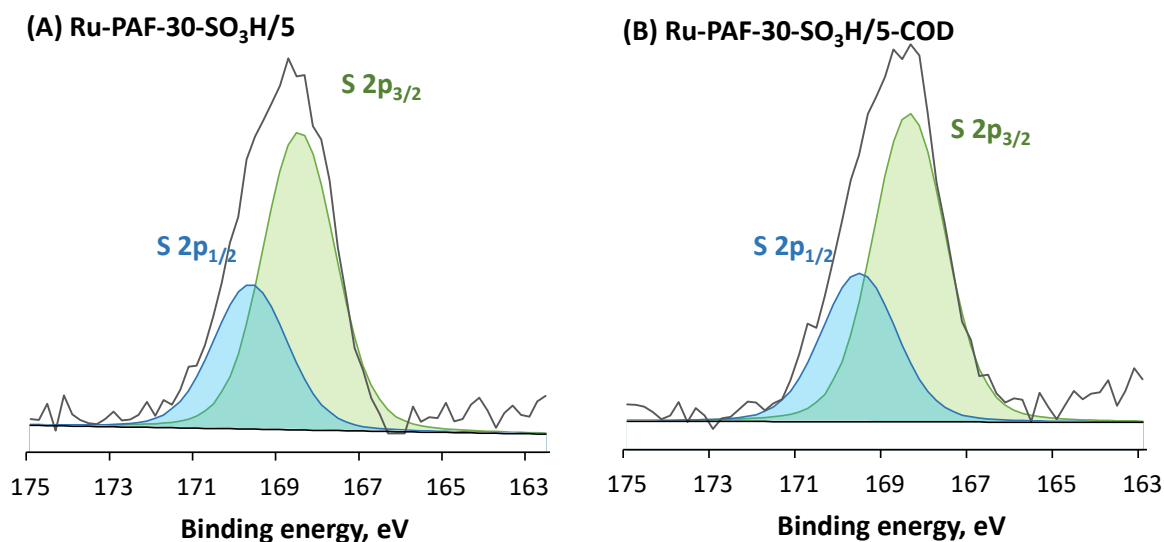

**Figure S6.** High-resolution XPS spectra of S2p region for Ru-PAF-30-SO<sub>3</sub>H/5 (A) and Ru-PAF-30-SO<sub>3</sub>H/5 (B) catalysts after the 3<sup>rd</sup> catalytic run.

**Table S3.** Guaiacol HDO over different catalysts.

| Catalyst                                                                                                                                                            | Sub/Me | Conv., % | Products                                                                                                                                                                                                          | Yield, %                                                                            | Ref.      |
|---------------------------------------------------------------------------------------------------------------------------------------------------------------------|--------|----------|-------------------------------------------------------------------------------------------------------------------------------------------------------------------------------------------------------------------|-------------------------------------------------------------------------------------|-----------|
| Ru-PAF-30-SO <sub>3</sub> H/2.5-COD<br>(Ru = 0.79 wt.%)<br>3 MPa H <sub>2</sub> ; 250 °C;<br>500 µL H <sub>2</sub> O; 0.38 mmol guaiacol;<br>5 mg of catalyst; 2 h; | 972    | 89       | 2-methoxy-cyclohexanol<br>Cyclohexanol<br>Cyclohexane                                                                                                                                                             | 33<br>40<br>16                                                                      | This work |
| Ru NPs@SILP-1.00<br>(Ru = 0.32 wt.%)<br>12 MPa H <sub>2</sub> ; 175 °C;<br>1 mL decalin; 2.4 mmol guaiacol;<br>75 mg of catalyst; 16 h                              | 1000   | >99%     | 2-methoxy-cyclohexanol<br>Methoxycyclohexane<br>Cyclohexanol<br>Cyclohexane                                                                                                                                       | 14<br>4<br>1<br>81                                                                  | [1]       |
| Ru-MWCNT<br>(Ru = 5 wt.%)<br>4 MPa H <sub>2</sub> , 270 °C;<br>29 mL H <sub>2</sub> O, 8,96 mmol guaiacol;<br>20 mg of catalyst; 1h                                 | 906    | 98.1 %   | Cyclohexane<br>Methoxycyclohexane<br>Cyclohexanol<br>Cyclohexanone<br>Cyclopentanemethanol<br>2-methoxy-cyclohexanol<br>1,2-Cyclohexanediol<br>Catechol                                                           | 34.9<br>0.2<br>2.2<br>0.1<br>2.6<br>13.6<br>0.3<br>0.1                              | [2]       |
| Ru-AC<br>(Ru = 5 wt.%)<br>4 MPa H <sub>2</sub> , 270 °C;<br>29 mL H <sub>2</sub> O, 8,96 mmol guaiacol;<br>20 mg of catalyst; 1h                                    | 906    | 96.1 %   | Cyclopentane<br>Cyclohexane<br>Methylcyclohexane<br>Methoxycyclohexane<br>Cyclohexanol<br>Cyclohexanone<br>Cyclopentanemethanol<br>Anisole<br>Phenol<br>2-methoxy-cyclohexanol<br>1,2-Cyclohexanediol<br>Catechol | 0.2<br>24.7<br>0.3<br>0.4<br>10.2<br>0.8<br>1.6<br>0.2<br>0.3<br>22.7<br>1.0<br>0.1 | [2]       |
| Ru-CARF<br>(Ru = 5 wt.%)<br>4 MPa H <sub>2</sub> , 270 °C;<br>29 mL H <sub>2</sub> O, 8,96 mmol guaiacol;<br>20 mg of catalyst; 1h                                  | 906    | 81.6 %   | Cyclohexane<br>Methylcyclohexane<br>Methoxycyclohexane<br>Cyclohexanol<br>Cyclohexanone<br>Cyclopentanemethanol<br>Anisole<br>Phenol<br>2-methoxy-cyclohexanol<br>1,2-Cyclohexanediol<br>Catechol                 | 5.7<br>1.1<br>0.1<br>24.5<br>1.9<br>0.7<br>0.3<br>4.2<br>17.3<br>0.5<br>0.1         | [2]       |

|                                                                                                                                                                   |      |         |                          |      |           |
|-------------------------------------------------------------------------------------------------------------------------------------------------------------------|------|---------|--------------------------|------|-----------|
| Ru-Vulcan<br>(Ru = 5 wt.%)<br>4 MPa H <sub>2</sub> , 270 °C;<br>29 mL H <sub>2</sub> O, 8,96 mmol guaiacol;<br>20 mg of catalyst; 1h                              | 906  | 77.0 %  | Cyclohexane              | 11.9 | [2]       |
|                                                                                                                                                                   |      |         | Methylcyclohexane        | 1.2  |           |
|                                                                                                                                                                   |      |         | Methoxycyclohexane       | 0.1  |           |
|                                                                                                                                                                   |      |         | Cyclohexanol             | 12.7 |           |
|                                                                                                                                                                   |      |         | Cyclohexanone            | 1.1  |           |
|                                                                                                                                                                   |      |         | Cyclopentanemethanol     | 0.6  |           |
|                                                                                                                                                                   |      |         | Anisole                  | 2.2  |           |
|                                                                                                                                                                   |      |         | Phenol                   | 12.3 |           |
|                                                                                                                                                                   |      |         | 2-methoxy-cyclohexanol   | 8.8  |           |
|                                                                                                                                                                   |      |         | 1,2-Cyclohexanediol      | 0.7  |           |
| Ru-PAF-30-SO <sub>3</sub> H/5-COD<br>(Ru = 0.76 wt.%)<br>3 MPa H <sub>2</sub> ; 250 °C;<br>500 µL H <sub>2</sub> O; 0.38 mmol guaiacol;<br>5 mg of catalyst; 2 h; | 1010 | 83%     | Catechol                 | 0.1  | This work |
|                                                                                                                                                                   |      |         | Cyclohexanone            | 44   |           |
|                                                                                                                                                                   |      |         | Cyclopentanemethanol     | 11   |           |
|                                                                                                                                                                   |      |         | Cyclopentanecarbaldehyde | 8    |           |
|                                                                                                                                                                   |      |         | Cyclohexane              | 1    |           |
| Ru/HY<br>(Ru = 5 wt.%)<br>4 MPa H <sub>2</sub> ; 250 °C;<br>30 mL H <sub>2</sub> O; 0.81 mmol guaiacol;<br>100 mg of catalyst; 2 h;                               | 16   | 91      | Alkylation products      | 19   | [3]       |
|                                                                                                                                                                   |      |         | Cyclohexanone            | 27.5 |           |
|                                                                                                                                                                   |      |         | Cyclohexane              | 18.5 |           |
|                                                                                                                                                                   |      |         | Cyclohexanol             | 18.1 |           |
|                                                                                                                                                                   |      |         | Gases                    | 10.0 |           |
|                                                                                                                                                                   |      |         | Ring-open products       | 8.2  |           |
|                                                                                                                                                                   |      |         | Cyclopentylmethanol      | 7.9  |           |
|                                                                                                                                                                   |      |         | Dimers                   | 6.3  |           |
| Ru-PAF-30-SO <sub>3</sub> H/5<br>(Ru = 4.68 wt.%)<br>3 MPa H <sub>2</sub> ; 250 °C;<br>500 µL H <sub>2</sub> O; 0.38 mmol guaiacol;<br>5 mg of catalyst; 2 h;     | 164  | 100     | Others                   | 3.5  | This work |
|                                                                                                                                                                   |      |         | 2-methoxy-cyclohexanol   | 35   |           |
|                                                                                                                                                                   |      |         | Anisole                  | 2    |           |
|                                                                                                                                                                   |      |         | Cyclohexanol             | 8    |           |
|                                                                                                                                                                   |      |         | Cyclohexane              | 55   |           |
| NSMP-Ru<br>(Ru = 3.6 wt.%)<br>5 MPa H <sub>2</sub> , 200 °C;<br>1 mL H <sub>2</sub> O, 0.4 mmol guaiacol;<br>5 mg of catalyst, 2h                                 | 225  | >99 %   |                          |      | [4]       |
|                                                                                                                                                                   |      |         | Methoxycyclohexanol      | 86   |           |
|                                                                                                                                                                   |      |         | Cyclohexanol             | 13   |           |
| 5%Ru/AMWCNTs<br>(Ru = 5 wt.%)<br>2MPa H <sub>2</sub> , 200 °C;<br>5.4 mL decalin, 10 mmol guaiacol;<br>100 mg of catalyst, 200 min                                | 202  | 49.32 % | Methylcyclohexanol       | <1   | [5]       |
|                                                                                                                                                                   |      |         | Cyclohexanol             | 33.2 |           |
|                                                                                                                                                                   |      |         | 1,2-Cyclohexanediol      | 5.2  |           |
|                                                                                                                                                                   |      |         | Cyclohexane              | 1.4  |           |
|                                                                                                                                                                   |      |         | Cyclohexanone            | 1.7  |           |
|                                                                                                                                                                   |      |         | Phenol                   | 1.2  |           |
|                                                                                                                                                                   |      |         | Benzene                  | 1.8  |           |
|                                                                                                                                                                   |      |         | Others                   | 4.9  |           |
| Ru/HNT-t (3)<br>(Ru = 2 wt.%)<br>3 MPa H <sub>2</sub> ; 180 °C;<br>2.7 mL H <sub>2</sub> O; 2.42 mmol guaiacol;<br>61 mg of catalyst; 3 h;                        | 200  | 100%    |                          |      | [6]       |
|                                                                                                                                                                   |      |         | Cyclohexanol             | 35.4 |           |
|                                                                                                                                                                   |      |         | 2-methoxycyclohexanol    | 25.4 |           |
|                                                                                                                                                                   |      |         | 4-methylcyclohexanol     | 24.1 |           |
|                                                                                                                                                                   |      |         | Cyclohexane              | 12.6 |           |
|                                                                                                                                                                   |      |         | Phenol                   | 2.0  |           |
|                                                                                                                                                                   |      |         | p-cresol                 | 0.4  |           |
|                                                                                                                                                                   |      |         | Cyclohexanone            | 0.1  |           |

|                                                                                                                                                                           |  |  |     |        |                                                      |                    |     |
|---------------------------------------------------------------------------------------------------------------------------------------------------------------------------|--|--|-----|--------|------------------------------------------------------|--------------------|-----|
| Ru/TiO <sub>2</sub> –Al <sub>2</sub> O <sub>3</sub><br>(Ru = 1.04 wt.%)<br>1 MPa H <sub>2</sub> ; 240 °C;<br>20 mL octane; 0.81 mmol guaiacol;<br>50 mg of catalyst; 4 h; |  |  | 157 | 91.4 % | Cyclohexane<br>Cyclohexanol<br>2-methoxycyclohexanol | 89.4<br>9.0<br>1.6 | [7] |
|---------------------------------------------------------------------------------------------------------------------------------------------------------------------------|--|--|-----|--------|------------------------------------------------------|--------------------|-----|

## References

1. Luska, K. L.; Migowski, P.; El Sayed, S.; Leitner, W. Synergistic Interaction within Bifunctional Ruthenium Nanoparticle/SILP Catalysts for the Selective Hydrodeoxygenation of Phenols. *Angewandte Chemie International Edition* **2015**, *54* (52), 15750–15755. <https://doi.org/10.1002/ANIE.201508513>.
2. Dwiatmoko, A. A.; Zhou, L.; Kim, I.; Choi, J. W.; Suh, D. J.; Ha, J. M. Hydrodeoxygenation of Lignin-Derived Monomers and Lignocellulose Pyrolysis Oil on the Carbon-Supported Ru Catalysts. *Catal Today* **2016**, *265*, 192–198. <https://doi.org/10.1016/J.CATTOD.2015.08.027>.
3. Wang, H.; Ruan, H.; Feng, M.; Qin, Y.; Job, H.; Luo, L.; Wang, C.; Engelhard, M. H.; Kuhn, E.; Chen, X.; Tucker, M. P.; Yang, B. One-Pot Process for Hydrodeoxygenation of Lignin to Alkanes Using Ru-Based Bimetallic and Bifunctional Catalysts Supported on Zeolite Y. *ChemSusChem* **2017**, *10* (8), 1846–1856. <https://doi.org/10.1002/CSSC.201700160>.
4. Boronoev, M. P.; Shakirov, I. I.; Ignat'eva, V. I.; Maximov, A. L.; Karakhanov, E. A. A Nanospherical Mesoporous Ruthenium-Containing Polymer as a Guaiacol Hydrogenation Catalyst. *Petroleum Chemistry* **2019**, *59* (12), 1300–1306. <https://doi.org/10.1134/S096554411912003X>.
5. Long, W.; Liu, P.; Xiong, W.; Hao, F.; Luo, H. Conversion of Guaiacol as Lignin Model Component Using Acid-Treated, Multi-Walled Carbon Nanotubes Supported Ru–MnO Bimetallic Catalysts. *Can J. Chem.* **2020**, *98* (2), 57–65. <https://doi.org/10.1139/CJC-2019-0261>.
6. Zasyalov, G.; Vutolkina, A.; Klimovsky, V.; Abramov, E.; Vinokurov, V.; Glotov, A. Hydrodeoxygenation of Guaiacol over Halloysite Nanotubes Decorated with Ru Nanoparticles: Effect of Alumina Acid Etching on Catalytic Behavior and Reaction Pathways. *Appl Catal B* **2024**, *342*, 123425. <https://doi.org/10.1016/J.APCATB.2023.123425>.
7. Lin, B.; Li, R.; Shu, R.; Wang, C.; Yuan, Z.; Liu, Y.; Chen, Y. Synergistic Effect of Highly Dispersed Ru and Moderate Acid Site on the Hydrodeoxygenation of Phenolic Compounds and Raw Bio-Oil. *Journal of the Energy Institute* **2020**, *93* (3), 847–856. <https://doi.org/10.1016/j.joei.2019.07.009>.

**Disclaimer/Publisher's Note:** The statements, opinions and data contained in all publications are solely those of the individual author(s) and contributor(s) and not of MDPI and/or the editor(s). MDPI and/or the editor(s) disclaim responsibility for any injury to people or property resulting from any ideas, methods, instructions or products referred to in the content.
